# Supplementary material for: JNK Pathway Mediates Low Oxygen Level Induced Epithelial–Mesenchymal Transition and Stemness Maintenance in Colorectal Cancer Cells
Source: MDPI journal article supplement (doi:10.3390/cancers12010224), 2020-01-16

Article

# JNK Pathway Mediates Low Oxygen Level-induced Epithelial-Mesenchymal Transition and Stemness Maintenance in Colorectal Cancer Cells

Shing Yau TAM, Vincent W.C. Wu and Helen K.W. Law

**Table S1.** List of primary antibodies used in Western blotting.

| Primary Antibody (clones)         | Source | Purchased from                                     | Catalog Number |
|-----------------------------------|--------|----------------------------------------------------|----------------|
| $\beta$ -Actin (D6A8)             | Rabbit | Cell Signaling Technology, Inc., Danvers, MA (CST) | 8457           |
| Akt                               | Rabbit | CST                                                | 9272           |
| Phosphor-Akt (Ser473)             | Rabbit | CST                                                | 9271           |
| Phosphor-c-Jun (Ser73) (D47G9)    | Rabbit | CST                                                | 3270           |
| E-cadherin (24E10)                | Rabbit | CST                                                | 3195           |
| Fibronectin                       | Rabbit | Abcam, Eugene, OR                                  | ab2413         |
| Nanog (D73G4) XP                  | Rabbit | CST                                                | 4903           |
| Nucleoporin 62 (SQSTM1/p62)       | Rabbit | CST                                                | 5114           |
| Oct-4                             | Rabbit | CST                                                | 2750           |
| SAPK/JNK                          | Rabbit | CST                                                | 9252           |
| Phosphor-SAPK/JNK (Thr183/Tyr185) | Rabbit | CST                                                | 9251           |
| Snail (C15D3)                     | Rabbit | CST                                                | 3879           |
| TWIST1                            | Rabbit | CST                                                | 46702          |
| Vimentin (D21H3) XP               | Rabbit | CST                                                | 5741           |

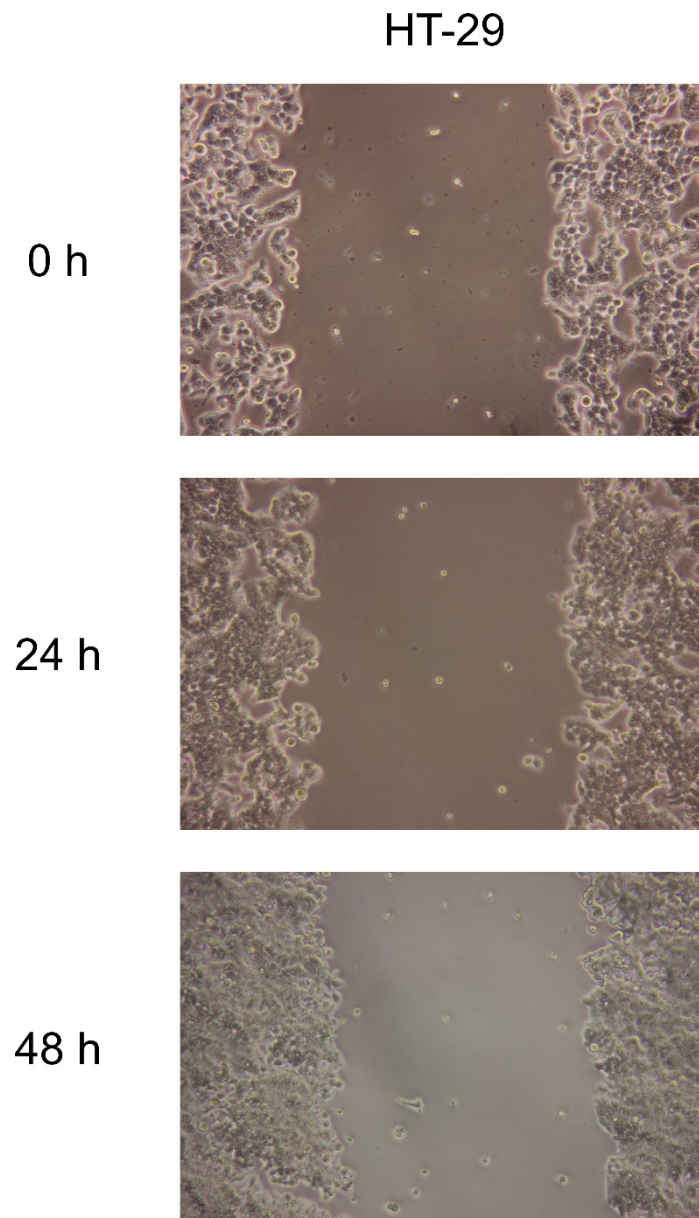

**Figure S1.** Preliminary experiment of HT-29 wound healing assay. The preliminary experiment shows that HT-29 has insignificant migration capacity in 24 or 48 hours under normoxia with 0.1% DMSO. Therefore, HT-29 was excluded in the wound healing assay in this study.

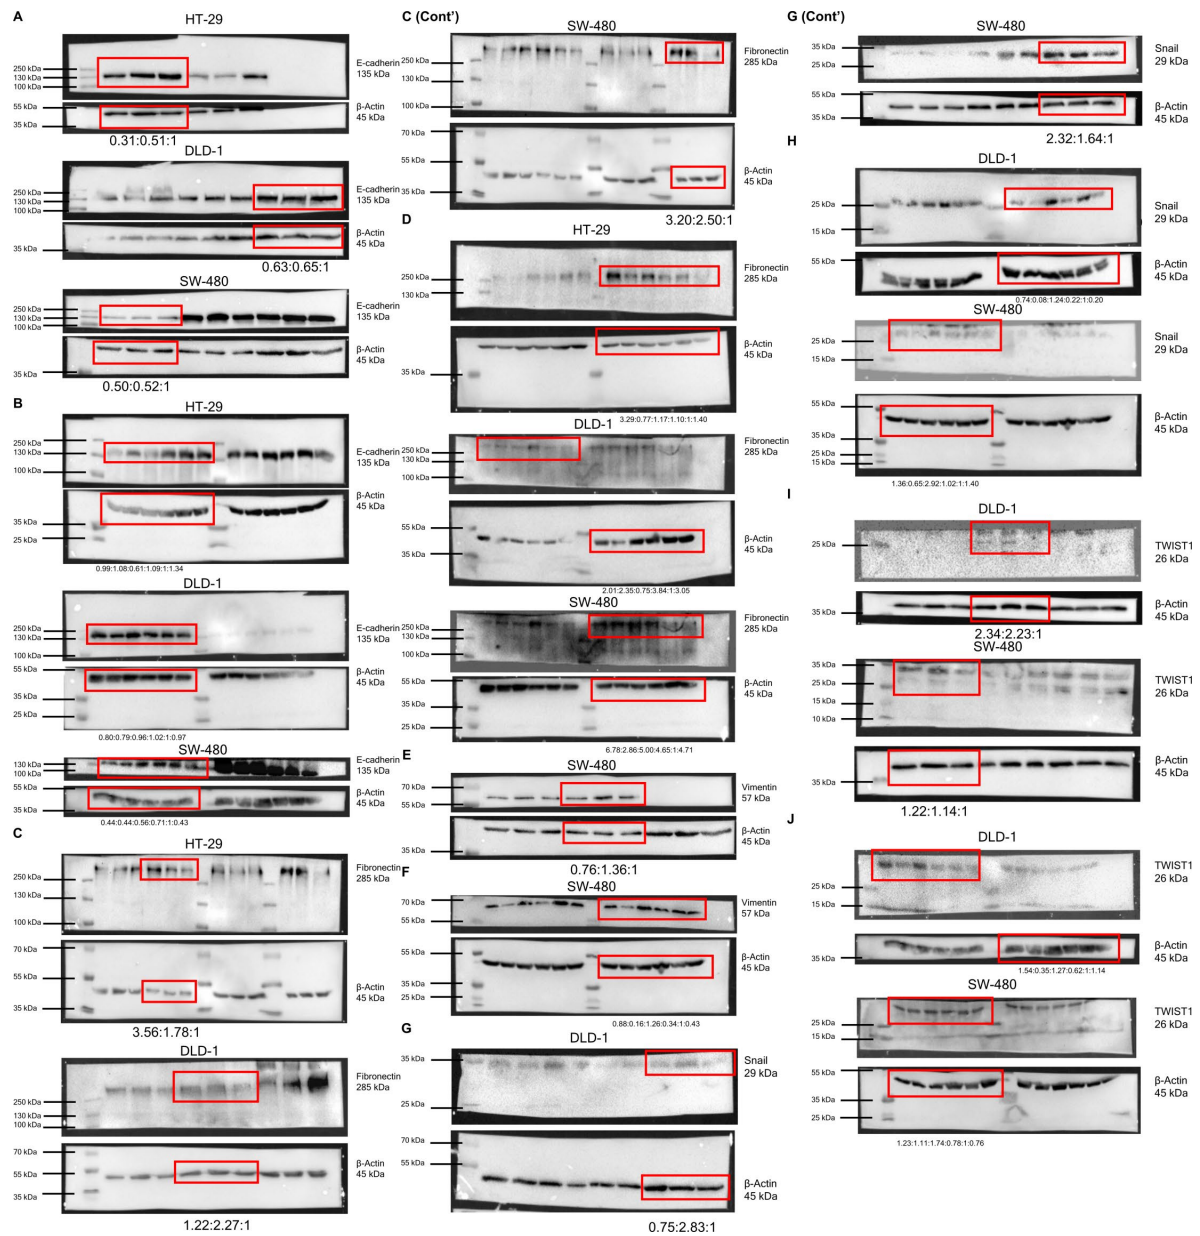

Figure S2. Original western blots of Figure 4.

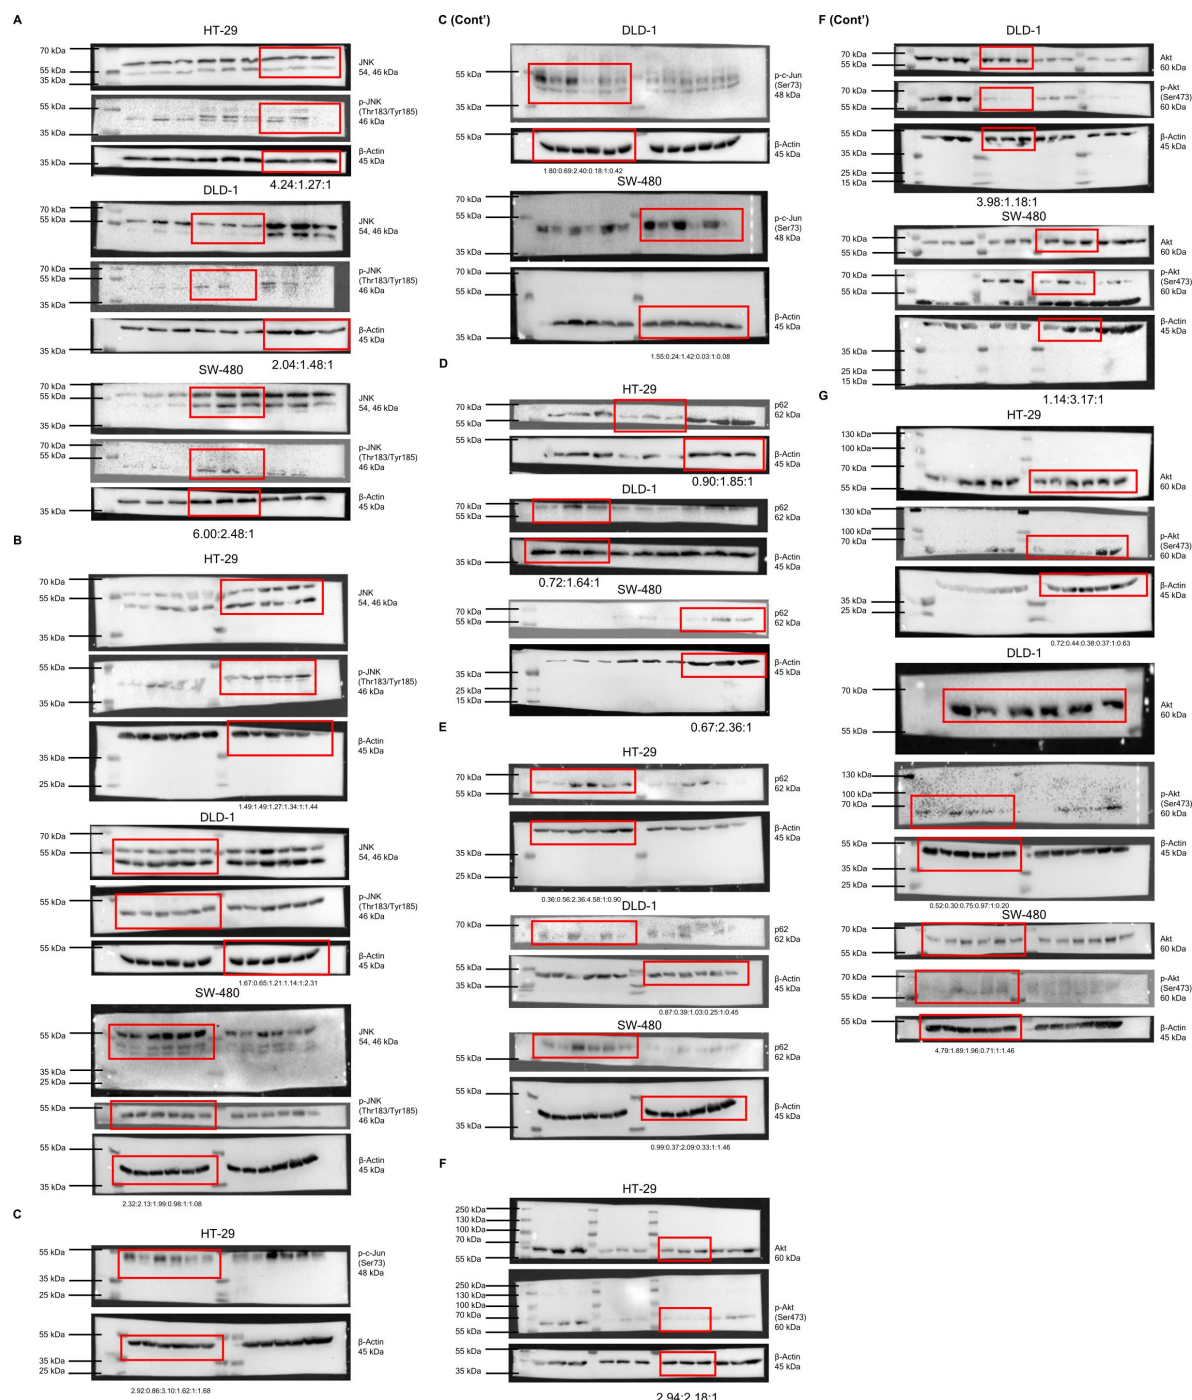

Figure S3. Original western blots of Figure 5.



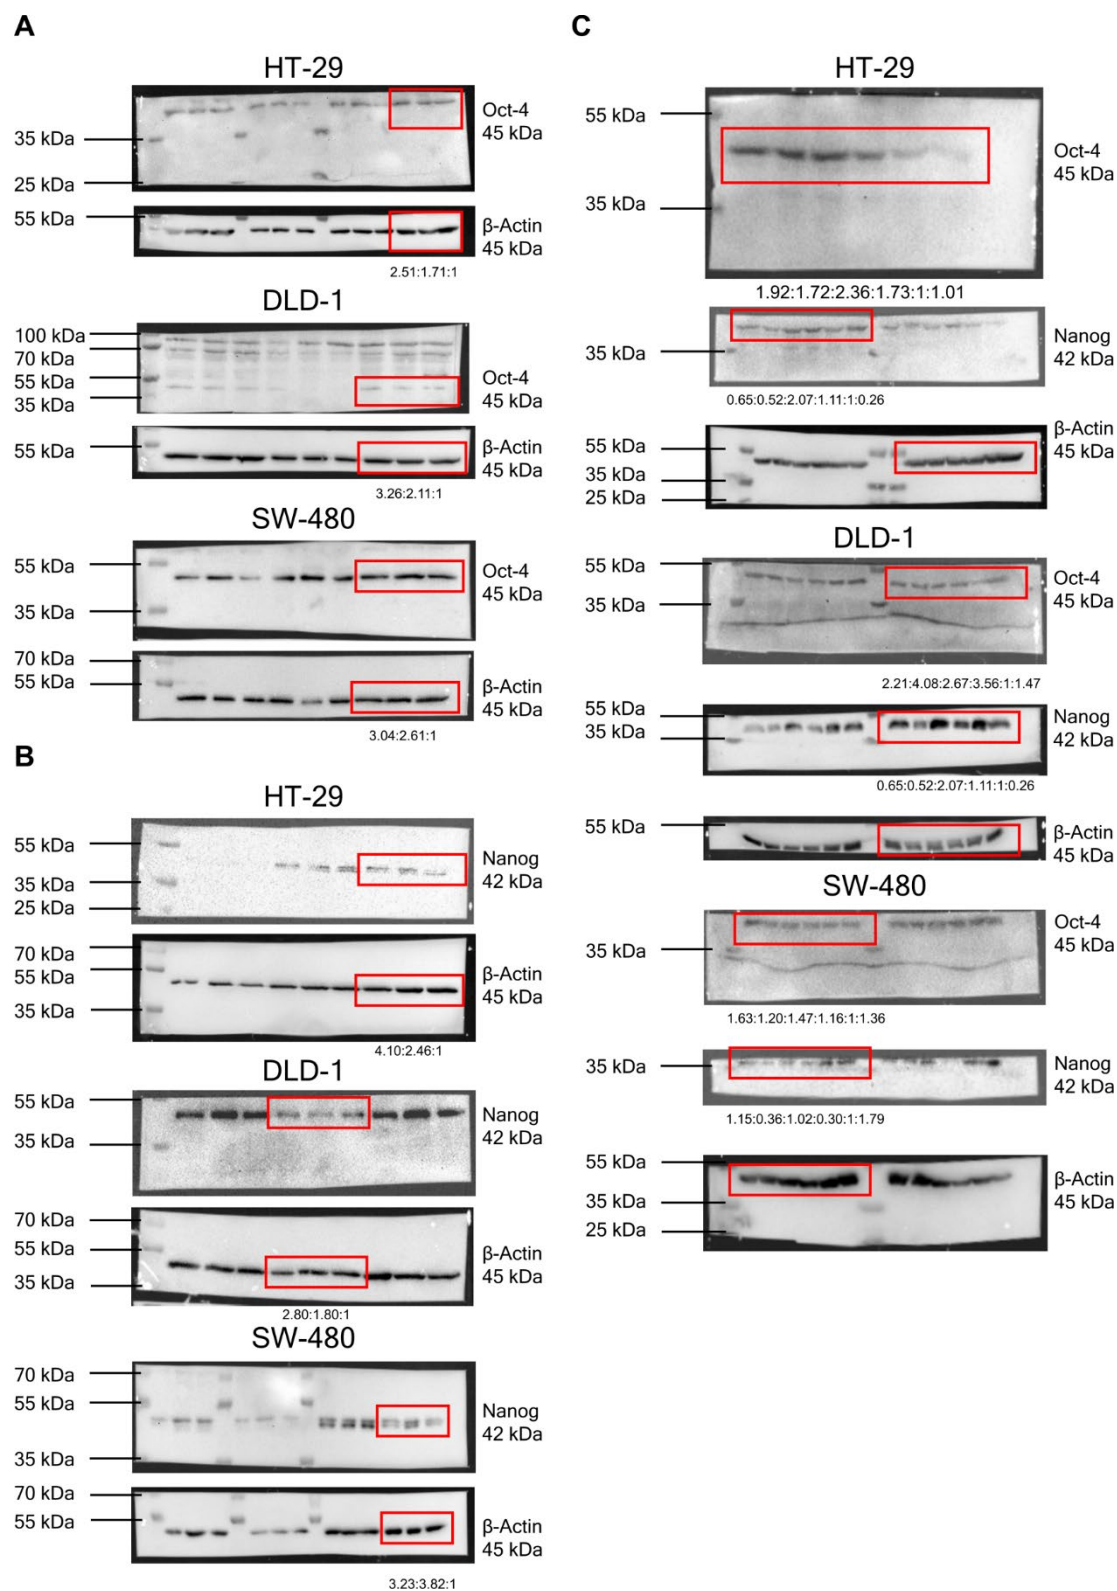

Figure S4. Original western blots of Figure 6.

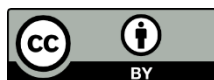

Supplement: s1 [file s1]
